# Supplementary material for: Farmers’ Perception on the Welfare of Broiler Chickens in Smallholder Production Systems in Kiambu County, Kenya
Source: Hindawi journal article supplement (doi:10.1155/2022/7502751), 2022-04-25
Supplement: f1 [file 7502751.f1.docx]

**Supplementary information**

**Table Sup1: Characteristics of broiler chicken production in the study area**

| Parameters | Kikuyu (n =42) | Kabete (n=78) | Mean |
| --- | --- | --- | --- |
| Live weight of birds during data collection (kg) | | | |
| 1.1-1.5 | 68.63 | 65.20 | 66.92 |
| 1.6-2.0 | 21.36 | 30.37 | 25.87 |
| >2.0 | 10.00 | 3.22 | 6.61 |
| Age of birds during data collection (weeks) | | | |
| 1-3 | 42.91 | 33.58 | 38.24 |
| 3-6 | 44.42 | 61.97 | 53.20 |
| 6-8 | 11.34 | 4.44 | 7.89 |
| >8 | 1.33 | 0.00 | 0.67 |

**Table Sup2: Age of broiler farmers in Kikuyu and Kabete Sub-counties**

|  |  | | | | | | | | | |  |
| --- | --- | --- | --- | --- | --- | --- | --- | --- | --- | --- | --- |
| Age of farmers | Kikuyu | Karai | Sigona | Kinoo | Nachu | Kabete | Gitaru | Uthiru | Muguga | Nyathuna | Mean |
| 21-30 | 8.33 | 6.67 | 9.09 | 50.00 | 0.00 | 0.00 | 13.51 | 0.00 | 10.00 | 0.00 | 9.76 |
| 31-50 | 66.67 | 73.33 | 45.45 | 0.00 | 50.00 | 60.00 | 51.35 | 14.29 | 60.00 | 44.44 | 46.55 |
| 51-70 | 16.67 | 20.00 | 36.36 | 50.00 | 50.00 | 20.00 | 29.73 | 85.71 | 30.00 | 55.56 | 39.10 |
| >71 | 8.33 | 0.00 | 9.09 | 0.00 | 0.00 | 20.00 | 5.41 | 0.00 | 0.00 | 0.00 | 4.28 |

| **Table sup3: Gender of broiler farmers in Kikuyu and Kabete Sub-counties (numbers)** | | | | | | | | | | | | | | | | | | | | | | | | |
| --- | --- | --- | --- | --- | --- | --- | --- | --- | --- | --- | --- | --- | --- | --- | --- | --- | --- | --- | --- | --- | --- | --- | --- | --- |
|  |  | |  | |  | |  | |  |  | |  | |  | |  | |  | |  | |  | | |
|  |  | | Ward | | | | | | | | | | | | | | | | | | | Total | | |
|  |  | | kikuyu | | karai | | sigona | | kinoo | nachu | | kabete | | gitaru | | uthiru | | muguga | | nyathuna | |  | | |
| Gender | male | | 6 | | 3 | | 5 | | 2 | 0 | | 2 | | 7 | | 0 | | 3 | | 0 | | 28 | | |
| female | | 6 | | 12 | | 6 | | 0 | 2 | | 3 | | 30 | | 7 | | 17 | | 9 | | 92 | | |
| Total | | | 12 | | 15 | | 11 | | 2 | 2 | | 5 | | 37 | | 7 | | 20 | | 9 | | 120 | | |
| **Table sup4: Gender and marital status of broiler farmers in Kikuyu and Kabete Sub-counties (%)**   | Category | Kikuyu (n =12) | Karai (n=15) | Sigona (n=11) | Kinoo (n=2) | Nachu (n=2) | Kabete (n=5) | Gitaru (n=37) | Uthiru (n=7) | Muguga (n=20) | Nyathuna (n=9) | Mean |  | | --- | --- | --- | --- | --- | --- | --- | --- | --- | --- | --- | --- | --- | | Gender |  |  |  |  |  |  |  |  |  |  |  |  | | Female | 50.00 | 80.00 | 54.55 | 0.00 | 100.00 | 60.00 | 81.08 | 100.00 | 85.00 | 100.00 | 71.06 |  | | Male | 50.00 | 20.00 | 45.45 | 100.00 | 0.00 | 40.00 | 18.92 | 0.00 | 15.00 | 0.00 | 28.94 |  |   **Table sup5: Marital status of broiler farmers in Kikuyu and Kabete Sub-counties (numbers)** | | | | | | | | | | | | | | | | | | | | | | | | | |
|  | |  | |  | |  | |  | | |  | |  | |  | |  | |  | |  | |  |  | |
|  | |  | | Ward | | | | | | | | | | | | | | | | | | | | Total | |
|  | |  | | kikuyu | | karai | | sigona | | | kinoo | | nachu | | kabete | | gitaru | | uthiru | | muguga | | nyathuna |
| Please indicate your marital status | | Single | | 1 | | 1 | | 1 | | | 0 | | 0 | | 1 | | 2 | | 1 | | 0 | | 0 | 7 | |
| Married | | 11 | | 14 | | 8 | | | 2 | | 2 | | 4 | | 35 | | 6 | | 20 | | 9 | 111 | |
| widow/er | | 0 | | 0 | | 2 | | | 0 | | 0 | | 0 | | 0 | | 0 | | 0 | | 0 | 2 | |
| Total | | | | 12 | | 15 | | 11 | | | 2 | | 2 | | 5 | | 37 | | 7 | | 20 | | 9 | 120 | |
| **Table sup6: Marital status of broiler farmers in Kikuyu and Kabete Sub-counties (%)** | | | | | | | | | | | | | | | | | | | | | | | | | |
|  | | Ward | | | | | | | | | | | | | | | | | | | | |  |  | |
|  | | kikuyu | | karai | | sigona | | kinoo | | | nachu | | kabete | | gitaru | | uthiru | | muguga | | nyathuna | | Mean |  | |
| Single | | 8.33 | | 6.67 | | 9.09 | | 0.00 | | | 0.00 | | 20.00 | | 5.41 | | 14.29 | | 0.00 | | 0.00 | | 6.38 |  | |
| Married | | 91.67 | | 93.33 | | 72.73 | | 100.00 | | | 100.00 | | 80.00 | | 94.59 | | 85.71 | | 100.00 | | 100.00 | | 91.80 |
| Widow/widower | | 0.00 | | 0.00 | | 18.18 | | 0.00 | | | 0.00 | | 0.00 | | 0.00 | | 0.00 | | 0.00 | | 0.00 | | 1.82 |

| **Table sup7: Level of education of broiler farmers (numbers)** | | | | | | | | | | | | |
| --- | --- | --- | --- | --- | --- | --- | --- | --- | --- | --- | --- | --- |
|  |  |  |  |  |  |  |  |  |  |  |  |  |
|  |  | Ward | | | | | | | | | |  |
|  |  | kikuyu | karai | sigona | kinoo | nachu | kabete | gitaru | uthiru | muguga | nyathuna | Mean |
| Please indicate the highest level of education you have attained | Primary school | 1 | 6 | 8 | 0 | 1 | 2 | 10 | 4 | 3 | 1 | 36 |
| Secondary school | 7 | 7 | 1 | 1 | 1 | 2 | 21 | 3 | 15 | 7 | 65 |
| Post-secondary | 4 | 2 | 2 | 1 | 0 | 1 | 6 | 0 | 2 | 1 | 19 |
| Total | | 12 | 15 | 11 | 2 | 2 | 5 | 37 | 7 | 20 | 9 | 120 |
| **Table sup8: Level of education of broiler farmers (%)** | | | | | | | | | | | | |
| Education level | Kikuyu (n =12) | Karai (n=15) | Sigona (n=11) | Kinoo (n=2) | Nachu (n=2) | Kabete (n=5) | Gitaru (n=37) | Uthiru (n=7) | Muguga (n=20) | Nyathuna (n=9) | Mean |  |
| Secondary school | 58.33 | 46.67 | 9.09 | 50.00 | 50.00 | 40.00 | 56.76 | 42.86 | 75.00 | 77.78 | 50.65 |  |
| Primary school | 8.33 | 40.00 | 72.73 | 0.00 | 50.00 | 40.00 | 27.03 | 57.14 | 15.00 | 11.11 | 32.13 |  |
| Post-secondary | 33.33 | 13.33 | 18.18 | 50.00 | 0.00 | 20.00 | 16.22 | 0.00 | 10.00 | 11.11 | 17.22 |  |
| None | 0.00 | 0.00 | 0.00 | 0.00 | 0.00 | 0.00 | 0.00 | 0.00 | 0.00 | 0.00 | 0.00 |  |

**Table sup9: Land size of broiler farmers (hectares)**

| Land size (hectares/ farmer) | Kikuyu (n =12) | Karai (n=15) | Sigona (n=11) | Kinoo (n=2) | Nachu (n=2) | Kabete (n=5) | Gitaru (n=37) | Uthiru (n=7) | Muguga (n=20) | Nyathuna (n=9) | Mean |
| --- | --- | --- | --- | --- | --- | --- | --- | --- | --- | --- | --- |
| Mean | 0.74 | 0.93 | 0.50 | 1.63 | 2.13 | 0.45 | 0.21 | 0.19 | 0.59 | 0.74 | 0.81 |
| SD | 1.00 | 1.23 | 0.37 | 1.94 | 2.65 | 0.32 | 0.17 | 0.08 | 0.64 | 0.59 | 0.90 |

**Table sup10: Analysis of land size of broiler farmers**

| Ward | Mean | N | Std. Deviation | Median |
| --- | --- | --- | --- | --- |
| kikuyu | .7354 | 12 | 1.00411 | .3750 |
| karai | .9333 | 15 | 1.23008 | .5000 |
| sigona | .5000 | 11 | .37081 | .5000 |
| kinoo | 1.6250 | 2 | 1.94454 | 1.6250 |
| nachu | 2.1250 | 2 | 2.65165 | 2.1250 |
| kabete | .4500 | 5 | .32596 | .2500 |
| gitaru | .2143 | 37 | .16656 | .1250 |
| uthiru | .1871 | 7 | .08134 | .2500 |
| muguga | .5938 | 20 | .64364 | .2500 |
| nyathuna | .7361 | 9 | .58778 | .5000 |
| Total | .5485 | 120 | .77767 | .2500 |

**Table sup11: Challenges to broiler production in study area**

| Challenges to broiler production | | | | Responses | | | |  | |
| --- | --- | --- | --- | --- | --- | --- | --- | --- | --- |
| N | | Percent | |  | |
| High cost of feeds | | | | 102 | | 87.2% | |  | |
| Diseases | | | | 73 | | 62.4% | |  | |
| Lack of market | | | | 49 | | 20.9% | |  | |
| Veterinary costs | | | | 11 | | 9.4% | |  | |
| Total | | | | 235 | | 159.0% | |  | |
| **Table sup12: Measurement of stocking density, humidity, temperature, and size of ventilation of boiler houses in the study area** | | | | | | | | | |
| Parameter | Kikuyu (n =12) | Karai (n=15) | Sigona (n=11) | | Kinoo (n=2) | | Nachu (n=2) | | Kabete (n=5) | | Gitaru (n=37) | Uthiru (n=7) | Muguga (n=20) | Nyathuna (n=9) | Mean |
| Stocking density (kg/m2) | 13.88 | 16.8 | 8.06 | | 6.59 | | 6.05 | | 11.83 | | 15.62 | 17.09 | 19.35 | 19.31 | 13.46±9.57 |
| House Humidity (%) | 46.7 | 50.7 | 48.2 | | 50 | | 50 | | 48 | | 45.4 | 47.1 | 55.3 | 52.2 | 49.4±0.46 |
| House temp (°C) | 28.9 | 24.8 | 28.3 | | 24.5 | | 27.5 | | 26.9 | | 25.9 | 27.3 | 25.3 | 27.8 | 26.72±0.58 |
| Ventilation size (m2) | 3.31 | 4.75 | 1.5 | | 1.1 | | 0.9 | | 3.82 | | 1.73 | 1.46 | 2.33 | 2.77 | 2.37±1.75 |

**Table sup13: Human population in Kabete and Kikuyu Sub-counties**

| Sub-county | 2009 Census | | 2012 Census | | 2015 Projections | | 2017 Projections | |
| --- | --- | --- | --- | --- | --- | --- | --- | --- |
| Population | Density (km2) | Population | Density (km2) | Population | Density (km2) | Population | Density (km2) |
| Kabete | 140,427 | 2,329 | 152,778 | 2,534 | 166,216 | 2,757 | 175,825 | 2,916 |
| Kikuyu | 125,402 | 713 | 136,432 | 776 | 148,432 | 844 | 157,012 | 893 |
| **Total** | **265,829** | **3,042** | **289,210** | **3,310** | **314,648** | **3,601** | **332,837** | **3,809** |

Source: KNBS 2009

**Table sup14: Land size and human population of Kabete and Kikuyu Sub-counties**

| Ward | Area km2 | Human population, number |
| --- | --- | --- |
| Kabete | 10.1 | 30,657 |
| Gitaru | 13.5 | 29,177 |
| Muguga | 15.3 | 27,527 |
| Nyathuna | 17.8 | 28,771 |
| Uthiru | 3.5 | 24,295 |
| Karai | 27.6 | 20,420 |
| Nachu | 96.3 | 18,655 |
| Sigona | 24.5 | 26,823 |
| Kikuyu | 21 | 32,422 |
| Kinoo | 6.3 | 27,082 |

Source: KNBS 2009

|  | | | | | | | | | | | | | | | | | | |
| --- | --- | --- | --- | --- | --- | --- | --- | --- | --- | --- | --- | --- | --- | --- | --- | --- | --- | --- |
|  | | | | |  | | |  | |  | | | |  | |  |  |  |
|  | | | | |  | | |  | |  | | | |  | |  |  |  |
| **Table sup15: Analysis of farmers’ awareness of broiler chicken welfare** | | | | | | | | | | | | | | | | |  |  |
| Ward | | | | | Mean | | | N | | Std. Deviation | | | | Std. Error of Mean | | Variance |  |  |
| Kikuyu | | | | | 1.2500 | | | 12 | | .45227 | | | | .13056 | | .205 |  |  |
| Karai | | | | | 1.7333 | | | 15 | | .45774 | | | | .11819 | | .210 |  |  |
| Sigona | | | | | 1.2727 | | | 11 | | .46710 | | | | .14084 | | .218 |  |  |
| Kinoo | | | | | 1.0000 | | | 2 | | 0.00000 | | | | 0.00000 | | 0.000 |  |  |
| Nachu | | | | | 2.0000 | | | 2 | | 0.00000 | | | | 0.00000 | | 0.000 |  |  |
| Kabete | | | | | 1.2000 | | | 5 | | .44721 | | | | .20000 | | .200 |  |  |
| Gitaru | | | | | 1.0000 | | | 37 | | 0.00000 | | | | 0.00000 | | 0.000 |  |  |
| Uthiru | | | | | 1.0000 | | | 7 | | 0.00000 | | | | 0.00000 | | 0.000 |  |  |
| Muguga | | | | | 1.2000 | | | 20 | | .41039 | | | | .09177 | | .168 |  |  |
| Nyathuna | | | | | 1.0000 | | | 9 | | 0.00000 | | | | 0.00000 | | 0.000 |  |  |
| Total | | | | | 1.2000 | | | 120 | | .40168 | | | | .03667 | | .161 |  |  |
| **Table sup16: Analysis of farmers’ perception on broiler welfare indicators** | | | | | | | | | | | | | |  | |  |  |  |
| Parameter | | | Frequency | Percent | | | Valid Percent | | Cumulative Percent | | |
| Good feeding | very important | | 106 | 88.3 | | | 88.3 | | 88.3 | | |
| important | | 14 | 11.7 | | | 11.7 | | 100.0 | | |
| Total | | 120 | 100.0 | | | 100.0 | |  | | |
|  | | | | | | | | | | | |  |
| Good health | very important | | 99 | 82.5 | | | 82.5 | | 82.5 | | |  |
| important | | 13 | 10.8 | | | 10.8 | | 93.3 | | |  |
| slightly important | | 8 | 6.7 | | | 6.7 | | 100.0 | | |  |
| Total | | 120 | 100.0 | | | 100.0 | |  | | |  |
|  | | | | | | | | | | | |  |
| Suitable housing | very important | | 98 | 81.7 | | | 81.7 | | 81.7 | | |  |
| important | | 15 | 12.5 | | | 12.5 | | 94.2 | | |  |
| slightly important | | 6 | 5.0 | | | 5.0 | | 99.2 | | |  |
| not important | | 1 | .8 | | | .8 | | 100.0 | | |  |
| Total | | 120 | 100.0 | | | 100.0 | |  | | |  |
|  | | | | | | | | | | | |  |
| Appropriate behaviour | very important | | 57 | 47.5 | | | 47.5 | | 47.5 | | |  |
| important | | 26 | 21.7 | | | 21.7 | | 69.2 | | |  |
| slightly important | | 22 | 18.3 | | | 18.3 | | 87.5 | | |  |
| somehow important | | 8 | 6.7 | | | 6.7 | | 94.2 | | |  |
| not important | | 7 | 5.8 | | | 5.8 | | 100.0 | | |  |
| Total | | 120 | 100.0 | | | 100.0 | |  | | |  |
|  |  | |  |  | | |  | |  | | |  |
|  |  | |  |  | | |  | |  | | |  |
| **Table sup17: Farmers’ perception on broiler welfare indicators** | | | | | | | | | | | | |
| Parameter | | Level of importance | | | | Frequency/N* | | | | | Percentage | | | |
| Good feeding | | Very important | | | | 106 | | | | | 88.3 | | | |
| Important | | | | 14 | | | | | 11.7 | | | |
| Good health | | Very important | | | | 99 | | | | | 82.5 | | | |
| Important | | | | 13 | | | | | 10.8 | | | |
| Slightly important | | | | 8 | | | | | 6.7 | | | |
| Suitable housing | | Very important | | | | 98 | | | | | 81.7 | | | |
| Important | | | | 15 | | | | | 12.5 | | | |
| Slightly important | | | | 6 | | | | | 5.0 | | | |
| Not important | | | | 1 | | | | | .8 | | | |
| Appropriate behaviour | | Very important | | | | 57 | | | | | 47.5 | | | |
| Important | | | | 26 | | | | | 21.7 | | | |
| Slightly important | | | | 30 | | | | | 25.0 | | | |
| Not important | | | | 7 | | | | | 5.8 | | | |

**Table sup18: Sources of information on broiler chicken welfare**

| Sources | Responses | |
| --- | --- | --- |
| N | Percentage of cases |
| Radio/TV | 50 | 61.0% |
| Hatchery | 33 | 40.2% |
| Agrovets | 31 | 37.8% |
| Government extension agents | 25 | 30.5% |
| Feed millers | 13 | 15.9% |
| Other farmers | 19 | 15.8% |
| NGOs | 2 | 2.4% |

**Table sup19: Disease management practices by farmers in the study area**

|  | Ward | | | | | | | | | |  |
| --- | --- | --- | --- | --- | --- | --- | --- | --- | --- | --- | --- |
| Practices | Kikuyu (n =10) | Karai (n=13) | Sigona (n=9) | Kinoo (n=2) | Nachu (n=2) | Kabete (n=4) | Gitaru (n=36) | Uthiru (n=5) | Muguga (n=18) | Nyathuna (n=7) | Mean |
| Vaccination | 100.00 | 100.00 | 100.00 | 50.00 | 100.00 | 75.00 | 100.00 | 100.00 | 94.44 | 85.71 | 90.52 |
| Isolating sick birds | 20.00 | 7.69 | 33.33 | 50.00 | 50.00 | 25.00 | 33.33 | 0.00 | 50.00 | 28.57 | 29.79 |

**Table sup20: Common poultry diseases reported by farmers in the study area (numbers)**

|  |  |  |  |  |  |  |  |
| --- | --- | --- | --- | --- | --- | --- | --- |
|  |  |  | Diseases to vaccinate and manage against | | | |  |
|  | Ward | Gumboro | NCD | Coccidiosis | Pneumonia | Water belly | Mean |
|  | kikuyu | 4 | 7 | 0 | 0 | 1 | 0 |
|  | karai | 14 | 1 | 0 | 0 | 0 | 0 |
|  | sigona | 9 | 1 | 0 | 1 | 0 | 0 |
|  | kinoo | 1 | 1 | 0 | 0 | 0 | 0 |
|  | nachu | 0 | 0 | 1 | 0 | 0 | 0 |
|  | kabete | 5 | 0 | 0 | 0 | 0 | 0 |
|  | gitaru | 36 | 1 | 0 | 0 | 0 | 0 |
|  | uthiru | 7 | 0 | 0 | 0 | 0 | 0 |
|  | muguga | 15 | 4 | 0 | 0 | 0 | 1 |
|  | nyathuna | 7 | 2 | 0 | 0 | 0 | 0 |
|  | |  |  |  |  |  |  |
|  |  |  |  |  |  |  |  |
|  |  |  |  |  |  |  |  |
| **Table sup21: Common poultry diseases reported by farmers in the study area (%)** | | | | | | | |
| Ward | Gumboro | NCD | Coccidiosis | Pneumonia | Water belly | Mean |  |
| Kikuyu | 8.74 | 9.09 | 41.18 | 100 | 0 | 31.8 |  |
| Karai | 14.56 | 14.14 | 5.88 | 0 | 0 | 6.92 |  |
| Sigona | 8.74 | 9.09 | 5.88 | 100 | 100 | 44.74 |  |
| Kinoo | 0.97 | 1.01 | 5.88 | 0 | 0 | 1.57 |  |
| Nachu | 1.94 | 2.02 | 0 | 100 | 100 | 40.79 |  |
| Kabete | 2.91 | 3.03 | 0 | 0 | 0 | 1.19 |  |
| Gitaru | 34.94 | 35.35 | 100 | 0 | 0 | 34.06 |  |
| Uthiru | 4.85 | 5.05 | 0 | 0 | 0 | 1.98 |  |
| Muguga | 15.53 | 14.14 | 23.53 | 0 | 100 | 30.64 |  |
| Nyathuna | 6.79 | 7.07 | 11.76 | 0 | 0 | 5.12 |  |

**Table sup22: Broiler chicken feeding times reported by farmers in the study area**

| Feeding regime | Kikuyu (n =12) | Karai (n=15) | Sigona (n=11) | Kinoo (n=2) | Nachu (n=2) | Kabete (n=5) | Gitaru (n=37) | Uthiru (n=7) | Muguga (n=20) | Nyathuna (n=9) | Mean |
| --- | --- | --- | --- | --- | --- | --- | --- | --- | --- | --- | --- |
| Twice a day | 16.67 | 20.00 | 27.27 | 50.00 | 50.00 | 80.00 | 97.30 | 57.14 | 50.00 | 33.33 | 48.17 |
| Ad libitum | 66.67 | 53.33 | 54.55 | 50.00 | 50.00 | 20.00 | 2.70 | 0.00 | 40.00 | 11.11 | 34.84 |
| Three times a day | 8.33 | 26.67 | 0.00 | 0.00 | 0.00 | 0.00 | 0.00 | 28.57 | 10.00 | 55.56 | 12.91 |
| Once a day | 8.33 | 0.00 | 18.18 | 0.00 | 0.00 | 0.00 | 0.00 | 14.29 | 0.00 | 0.00 | 4.08 |
